# Supplementary material for: Evaluation and calibration of matrix effects during SIMS silicon isotope analysis in silicate glasses
Source: Royal Society of Chemistry journal article supplement (doi:10.1039/d4ja00253a), 2024-01-01
Supplement: d4ja00253a1.xlsx [file d4ja00253a1.xlsx]

## Sheet: DATA
Appendix S1. Supplementary single point silicon isotope and chemical composition of glass standard samples, which are determined by SIMS and EPMA, respectively.
	SIMS Data								EPMA Data(wt.%)												Parameters
Samples	SIMS analysis name	IP(nA)	Intensity 28Si (cps)	δ30Sim(‰)	2SE	δ30Sitrue(‰)	IMF(‰)		Na2O	K2O	MgO	CaO	MnO	FeO	Al2O3	SiO2	TiO2	P2O5	Total		NBO/T	M.A.M.	Si-Ca-Al-Mg
ARM-1	ARM-1-1@1	4.23429	302241100	-2.48166	0.0618552	0.08	-2.56166		4.1812	3.2005	3.7777	5.2335	0.0533	5.8693	13.3179	58.2171	1.0016	0.2346	95.1889		0.390144	21.7909	1.6987
	ARM-1-4@2	4.25541	296297100	-2.66762	0.0804629	0.08	-2.74762		4.1267	3.1693	3.7554	5.253	0.0705	5.8787	13.3991	59.7093	1.0109	0.2901	96.8185		0.378949	21.7673	1.59111
	ARM-1-6@3	4.24071	300051200	-2.5865	0.0800648	0.08	-2.6665		4.2178	3.1693	3.7729	5.1764	0.0601	5.8452	13.4274	59.5892	1.0316	0.2414	96.6609		0.378861	21.7555	1.56963
	ARM-1-7@4	4.40679	311014000	-2.71712	0.0684141	0.08	-2.79712		4.4184	3.194	3.7874	5.2354	0.0567	5.8647	13.3867	59.5225	1.0089	0.2325	96.8396		0.388272	21.7613	1.60144
	ARM-1-9@5	4.40742	311209800	-2.67641	0.0776305	0.08	-2.75641		4.202	3.1827	3.8227	5.2356	0.0404	5.8897	13.283	59.9555	0.9879	0.2458	96.9375		0.384199	21.7548	1.54451
	ARM-1-10@6	4.42424	310393100	-2.56717	0.0760883	0.08	-2.64717		4.166	3.165	3.8615	5.2155	0.0481	5.8612	13.4607	59.1633	1.0177	0.2389	96.3068		0.383647	21.7639	1.65545
	ARM-1-14@7	4.28561	303097700	-2.81434	0.0725887	0.08	-2.89434		4.1467	3.1674	3.7118	5.2542	0.0346	5.8686	13.298	59.6153	1.0119	0.3227	96.5461		0.379496	21.7649	1.56681
	ARM-1-17@8	4.27302	302795500	-2.70159	0.073737	0.08	-2.78159		4.1893	3.1457	3.7239	5.2083	0.0556	5.9449	13.3994	59.6727	0.9964	0.3125	96.7504		0.379004	21.7696	1.56327
	ARM-1-19@9	4.27497	301470500	-2.60407	0.0629571	0.08	-2.68407		4.2919	3.1838	3.7491	5.252	0.0423	5.9395	13.3496	59.3913	1.0157	0.2348	96.5719		0.386668	21.775	1.60573
	ARM-1-20@10	4.23687	302988500	-2.56132	0.0698444	0.08	-2.64132		4.2299	3.1617	3.7777	5.2314	0.0391	5.9717	13.3845	59.8554	1.0253	0.308	97.1212		0.382774	21.7689	1.56689
	ARM-1-23@11	4.25612	301058500	-2.58299	0.0571357	0.08	-2.66299		4.2454	3.1676	3.8033	5.2158	0.0402	5.7982	13.5439	59.6152	1.0171	0.2303	96.8101		0.377815	21.7453	1.62374
	ARM-1-24@12	4.2285	301761500	-2.3446	0.0634237	0.08	-2.4246		4.2039	3.1501	3.8257	5.2129	0.0598	5.9383	13.2836	59.5044	1.0154	0.2657	96.5729		0.386903	21.7708	1.57306
	ARM-1-25@13	4.30681	303316300	-2.47024	0.0605064	0.08	-2.55024		4.3009	3.1884	3.8032	5.2176	0.0608	5.8442	13.3223	59.4085	1.0282	0.2774	96.5614		0.386879	21.7634	1.58921
	ARM-1-27@14	4.25393	306174100	-2.30185	0.0665825	0.08	-2.38185		4.3782	3.1848	3.7641	5.1653	0.049	5.8898	13.4334	59.0786	1.0045	0.2802	96.3737		0.38584	21.7681	1.60893
	ARM-1-28@15	4.22623	303922100	-2.41137	0.0625211	0.08	-2.49137		4.2506	3.1969	3.7424	5.2241	0.0241	5.8797	13.2829	58.9651	1.0072	0.3169	95.9889		0.386739	21.7749	1.6108
ARM-2	ARM-2-1@1	4.24344	285963700	-2.62721	0.0766166	0.05	-2.67721		4.3602	2.9453	3.7071	5.0341	0.0657	5.7062	13.1873	58.6344	0.9754	0.2482	94.8699		0.379085	21.7307	1.50428
	ARM-2-2@2	4.22412	285600800	-2.73117	0.082593	0.05	-2.78117		4.1804	2.9524	3.6719	5.0602	0.0549	5.7809	13.0798	58.6428	1.0122	0.2416	94.6857		0.377635	21.7465	1.48479
	ARM-2-4@3	4.23836	286547400	-2.77247	0.0787554	0.05	-2.82247		4.0736	3.0046	3.7071	5.1267	0.046	5.7766	13.0183	58.7454	1.004	0.2939	94.8011		0.379638	21.7532	1.50466
	ARM-2-5@4	4.40836	298284400	-2.66587	0.0737279	0.05	-2.71587		4.1887	2.9744	3.8098	5.0972	0.0402	5.723	13.1112	58.6046	0.9991	0.243	94.8179		0.382772	21.7369	1.54409
	ARM-2-7@5	4.39983	297640600	-2.82342	0.074823	0.05	-2.87342		4.2507	3.0253	3.6472	4.9463	0.0263	5.6182	13.0713	58.6746	1.0004	0.2765	94.5666		0.372255	21.7163	1.41151
	ARM-2-10@6	4.41008	299241400	-2.77188	0.0871359	0.05	-2.82188		4.4317	2.9776	3.7145	5.1016	0.0504	5.7215	13.092	58.7355	1.0007	0.2801	95.1427		0.385377	21.7375	1.51103
	ARM-2-11@7	4.27513	289946300	-2.68783	0.0836136	0.05	-2.73783		4.3519	2.9568	3.6244	5.0692	0.0519	5.7674	13.0028	58.5446	1.0235	0.2349	94.6945		0.382382	21.7473	1.47031
	ARM-2-12@8	4.2695	289329600	-2.51768	0.075436	0.05	-2.56768		4.5188	2.958	3.7738	5.0718	0.0577	5.7538	13.1101	58.75	0.9837	0.2912	95.286		0.389224	21.736	1.50943
	ARM-2-14@9	4.2612	304038200	-2.91304	0.125649	0.05	-2.96304		4.0235	2.9928	3.7291	5.0896	0.0491	5.8432	13.1337	58.612	0.9596	0.2386	94.6766		0.37765	21.7571	1.52852
	ARM-2-16@10	4.23038	288686800	-2.648	0.0658073	0.05	-2.698		4.2909	2.9512	3.798	5.0423	0.0466	5.7809	13.1702	58.4226	1.0082	0.2257	94.7508		0.384053	21.7419	1.54187
	ARM-2-18@11	4.23101	289050700	-2.94437	0.235218	0.05	-2.99437		4.5171	2.9489	3.7481	5.0969	0.0569	5.7539	13.0527	58.588	0.9792	0.292	95.0411		0.390823	21.7413	1.51879
	ARM-2-19@12	4.2253	288986900	-2.62692	0.0785953	0.05	-2.67692		4.2695	2.9833	3.6382	5.0872	0.0611	5.7553	13.0797	58.4541	1.016	0.2529	94.6054		0.380437	21.7524	1.50997
	ARM-2-20@13	4.2188	287855900	-2.70482	0.068069	0.05	-2.75482		4.3181	2.9654	3.7467	5.1421	0.0612	5.7724	13.0305	59.069	0.9912	0.2699	95.4043		0.385633	21.742	1.49513
	ARM-2-22@14	4.20636	288162800	-2.66674	0.0670735	0.05	-2.71674		4.2273	2.993	3.6454	5.107	0.0428	5.7799	13.1951	58.6445	0.9969	0.2693	94.915		0.377064	21.75	1.53351
	ARM-2-23@15	4.19698	286835000	-2.74933	0.0760306	0.05	-2.79933		4.2643	2.9539	3.8524	5.1424	0.0519	5.8125	13.1852	58.5862	0.9997	0.301	95.1694		0.38812	21.7522	1.59748
ARM-3	ARM-3-1@1	4.47133	308076400	-2.62311	0.0668096	0.05	-2.67311		4.5693	3.2213	3.5172	5.4602	0.0558	6.0548	13.9376	60.8758	1.0367	0.2891	99.0296		0.373964	21.7811	1.68551
	ARM-3-2@2	4.442	303799300	-2.87292	0.0727802	0.05	-2.92292		4.4917	3.1738	3.5755	5.4288	0.0478	6.0738	13.9782	61.318	1.0392	0.279	99.4188		0.369912	21.7672	1.64996
	ARM-3-5@3	4.41274	302368300	-2.93002	0.0562615	0.05	-2.98002		4.6682	3.1614	3.6314	5.4747	0.0521	6.1655	14.0558	61.5569	1.0387	0.2591	100.072		0.376777	21.7727	1.68421
	ARM-3-7@4	4.2357	295303900	-2.67524	0.0591407	0.05	-2.72524		4.5511	3.1846	3.4874	5.437	0.0354	6.1436	13.9758	61.3942	1.0552	0.2433	99.5232		0.369379	21.7752	1.62946
	ARM-3-9@5	4.20855	303022000	-2.37652	0.0755387	0.05	-2.42652		4.6428	3.1775	3.5225	5.4594	0.0527	6.1346	13.9674	61.0136	1.0571	0.2741	99.3205		0.375634	21.7843	1.68104
	ARM-3-12@6	4.21794	301077600	-2.52969	0.0707315	0.05	-2.57969		4.4209	3.1756	3.4875	5.4479	0.0607	6.1909	13.8841	61.2211	1.0497	0.2569	99.2173		0.370493	21.7912	1.6287
	ARM-3-15@7	4.39404	315558600	-2.35515	0.0622337	0.05	-2.40515		4.7518	3.1727	3.5634	5.4582	0.0383	6.1128	13.9912	60.9884	1.0436	0.2304	99.3509		0.378712	21.7749	1.69662
	ARM-3-18@8	4.40147	304017400	-2.89195	0.0693282	0.05	-2.94195		4.6015	3.1853	3.5531	5.4527	0.0604	6.0812	14.0692	61.3768	1.0465	0.3036	99.7401		0.370854	21.7711	1.6757
	ARM-3-20@9	4.40437	307947300	-2.62018	0.0625773	0.05	-2.67018		4.5175	3.1908	3.5768	5.4604	0.0538	6.1012	13.9106	60.943	1.0394	0.3143	99.1082		0.375668	21.7835	1.68494
	ARM-3-21@10	4.48518	311974900	-2.67582	0.0636533	0.05	-2.72582		4.4562	3.1625	3.5367	5.4134	0.0345	6.0659	13.9504	60.9132	1.0503	0.2766	98.8693		0.369019	21.772	1.66313
	ARM-3-22@11	4.46601	309000200	-2.66528	0.0534213	0.05	-2.71528		4.6257	3.2081	3.5502	5.4267	0.0307	6.1297	13.9247	61.5324	1.0498	0.2774	99.7923		0.373752	21.7696	1.61145
	ARM-3-23@12	4.39248	307910600	-2.60554	0.0638173	0.05	-2.65554		4.6701	3.1648	3.4923	5.4145	0.0599	6.0613	14.1424	61.2459	1.0264	0.2194	99.4972		0.36752	21.7637	1.67184
	ARM-3-27@13	4.23304	299878400	-2.61403	0.0735224	0.05	-2.66403		4.4053	3.1685	3.5397	5.4554	0.0494	6.0635	13.8011	61.3571	1.0456	0.2631	99.1674		0.37033	21.7702	1.6109
	ARM-3-30@14	4.23734	305801500	-2.53232	0.0695922	0.05	-2.58232		4.6821	3.1993	3.5255	5.4498	0.0546	6.1114	14.0032	60.8507	1.0385	0.2596	99.1844		0.376404	21.7835	1.69963
	ARM-3-33@15	4.23985	301366400	-2.55839	0.0660213	0.05	-2.60839		4.6416	3.2099	3.4839	5.4333	0.04	6.1473	14.0736	60.9061	1.0475	0.2864	99.2801		0.372276	21.7863	1.69431
BHVO-2G	BHVO-2G-1@1	4.43339	350548000	2.1437	0.0733154	-0.29	2.4337		2.33	0.5014	7.1409	11.4313	0.1646	10.9815	13.3646	49.7599	2.7616	0.2381	98.7482		0.82036	22.8722	6.59245
	BHVO-2G-2@2	4.45616	351299300	2.05233	0.0714046	-0.29	2.34233		2.3254	0.4982	7.2482	11.4184	0.1709	10.9274	13.3145	49.9039	2.7703	0.2667	98.9139		0.823209	22.8588	6.58163
	BHVO-2G-5@3	4.4765	353860800	2.06815	0.0714976	-0.29	2.35815		2.2315	0.5226	7.2376	11.4682	0.1781	11.1079	13.5835	49.8091	2.7504	0.2794	99.209		0.819205	22.886	6.68134
	BHVO-2G-8@4	4.24485	336050100	2.10973	0.0617533	-0.29	2.39973		2.3964	0.4989	7.2637	11.3901	0.1756	11.0363	13.3866	49.4399	2.7722	0.2538	98.6993		0.831481	22.8809	6.62817
	BHVO-2G-9@5	4.24039	335700400	2.05555	0.0646229	-0.29	2.34555		2.2588	0.4887	7.3049	11.4553	0.1484	11.0535	13.5123	49.9809	2.7908	0.2688	99.3068		0.820137	22.8661	6.65487
	BHVO-2G-10@6	4.21958	335223500	2.00343	0.0861769	-0.29	2.29343		2.1488	0.5067	7.1823	11.4371	0.1835	11.0172	13.5333	49.8086	2.7764	0.2487	98.8878		0.812399	22.8787	6.64075
	BHVO-2G-12@7	4.40898	352171100	2.07869	0.0710215	-0.29	2.36869		2.2215	0.512	7.2702	11.4901	0.1727	11.0049	13.335	49.56	2.7512	0.2977	98.7009		0.829439	22.8847	6.66179
	BHVO-2G-13@8	4.40382	350931100	2.19115	0.0701748	-0.29	2.48115		2.3286	0.5125	7.4067	11.4228	0.19	11.0708	13.5136	48.8415	2.7614	0.277	98.3839		0.842043	22.9017	6.75963
	BHVO-2G-15@9	4.4021	351047900	2.18734	0.0581357	-0.29	2.47734		2.4133	0.4946	7.3224	11.4673	0.1601	11.1211	13.4417	49.1802	2.7701	0.2799	98.6957		0.840469	22.8974	6.71962
	BHVO-2G-16@10	4.46437	352304700	2.00811	0.0559397	-0.29	2.29811		2.1203	0.5074	7.328	11.4225	0.1704	11.0315	13.5465	49.2883	2.7614	0.3009	98.5304		0.82387	22.8885	6.71167
	BHVO-2G-17@11	4.3978	350889400	2.19613	0.0691421	-0.29	2.48613		2.2717	0.5055	7.2954	11.4933	0.1835	11.1332	13.5103	49.716	2.7606	0.2754	99.1954		0.82781	22.8909	6.69738
	BHVO-2G-18@12	4.39881	351692400	2.09978	0.0686978	-0.29	2.38978		2.343	0.4871	7.2773	11.4299	0.1692	10.9961	13.4741	49.9881	2.7894	0.2938	99.3439		0.820652	22.8612	6.62524
	BHVO-2G-20@13	4.24211	339642000	2.01895	0.0674294	-0.29	2.30895		2.3207	0.5068	7.3158	11.4205	0.1745	11.061	13.5082	49.4135	2.7948	0.2921	98.8713		0.829696	22.8859	6.68755
	BHVO-2G-21@14	4.25502	340120800	2.16362	0.0643591	-0.29	2.45362		2.1501	0.4809	7.3503	11.4342	0.1533	10.9768	13.4583	49.7488	2.735	0.2462	98.7655		0.820971	22.8624	6.65985
	BHVO-2G-22@15	4.23562	339933200	2.07664	0.0695914	-0.29	2.36664		2.3165	0.5065	7.2382	11.4867	0.1682	11.0548	13.3585	49.7732	2.758	0.2356	98.9593		0.828274	22.8803	6.6401
GOR128-G	GOR128-G-2@1	4.3004	304645500	2.11295	0.0615185	-0.46	2.57295		0.5688	0.0264	25.8365	6.2407	0.17	9.8748	9.8386	46.0043	0.2858	0.0018	99.3306		1.67705	21.8659	6.92342
	GOR128-G-3@2	4.28827	304772400	2.18383	0.0667686	-0.46	2.64383		0.5509	0.0163	26.0145	6.3162	0.1723	9.933	9.9359	45.7866	0.2734	0.0262	99.5256		1.69103	21.8759	7.04435
	GOR128-G-4@3	4.286	303456900	2.18968	0.0708751	-0.46	2.64968		0.5697	0.0267	25.9502	6.2604	0.1677	9.9276	9.9477	45.9375	0.2997	0.0235	99.5842		1.68115	21.8712	6.98975
	GOR128-G-8@4	4.41595	314611900	2.14722	0.0571126	-0.46	2.60722		0.5561	0.025	26.0654	6.3173	0.1993	9.9803	9.7685	46.1802	0.2746	0.0233	99.8603		1.69374	21.8785	6.97904
	GOR128-G-9@5	4.40703	314943800	2.19173	0.0616971	-0.46	2.65173		0.5561	0.025	26.0654	6.3173	0.1993	9.9803	9.7685	46.1802	0.2746	0.0233	99.8603		1.69374	21.8785	6.97904
	GOR128-G-11@6	4.42181	314800000	2.0781	0.0665511	-0.46	2.5381		0.631	0.0266	26.2179	6.2894	0.1867	9.8785	9.9629	46.5413	0.2896	0.0328	100.517		1.67874	21.8524	7.00908
	GOR128-G-13@7	4.36548	309932000	2.08191	0.0711918	-0.46	2.54191		0.5902	0.0267	25.8735	6.3017	0.1919	9.8638	9.7166	46.3888	0.297	0.0332	99.7576		1.67765	21.8658	6.90056
	GOR128-G-14@8	4.34037	306631300	2.24123	0.0524186	-0.46	2.70123		0.5193	0.032	26.1682	6.2658	0.178	9.9221	9.9054	45.8567	0.2796	0.0005	99.6225		1.69583	21.8685	7.03334
	GOR128-G-15@9	4.3101	306650000	2.1027	0.0538243	-0.46	2.5627		0.5454	0.0259	26.2109	6.3109	0.1683	9.944	9.7974	45.9264	0.2628	0.0225	99.6839		1.70477	21.8703	7.03441
	GOR128-G-17@10	4.25784	304512500	2.24708	0.0631115	-0.46	2.70708		0.5665	0.0389	26.1269	6.2691	0.1659	9.9435	9.843	46.0735	0.2838	-0.0054	99.821		1.69294	21.867	6.99225
	GOR128-G-19@11	4.2393	305434000	2.16128	0.0586491	-0.46	2.62128		0.5655	0.0325	25.9577	6.2849	0.1991	9.9038	9.7957	46.2156	0.2754	0.02	99.7139		1.68272	21.8701	6.94289
	GOR128-G-23@12	4.26261	304434000	2.21165	0.0616192	-0.46	2.67165		0.592	0.028	26.186	6.2482	0.1587	9.9248	9.8149	45.8038	0.2855	0.0034	99.5528		1.70464	21.8655	7.00978
	GOR128-G-26@13	4.34515	310886000	2.16889	0.0674522	-0.46	2.62889		0.5765	0.0238	26.0469	6.2966	0.187	9.9066	9.8565	45.9264	0.2803	0.0547	99.6968		1.69286	21.8723	7.00802
	GOR128-G-28@14	4.33341	311086900	2.16391	0.0574228	-0.46	2.62391		0.5948	0.0271	26.296	6.3198	0.1809	10.0054	9.858	46.3257	0.2932	0.0487	100.45		1.69815	21.8711	7.03539
	GOR128-G-30@15	4.34647	312143800	2.2872	0.0606617	-0.46	2.7472		0.5899	0.0227	25.9319	6.2634	0.1581	9.9138	9.7724	46.4205	0.2928	0.0206	99.8591		1.6758	21.8612	6.9017
KL2-G	KL2-G-1@1	4.33795	336894700	1.67455	0.0672863	-0.44	2.11455		2.3042	0.4762	7.3683	11.103	0.1792	10.7399	13.1773	50.1361	2.5792	0.3014	98.4389		0.814297	22.8042	6.37581
	KL2-G-3@2	4.35211	336387200	1.63296	0.0673678	-0.44	2.07296		2.2964	0.4957	7.318	11.0642	0.1746	10.7019	13.0652	49.8062	2.5394	0.2468	97.7947		0.817595	22.8091	6.34637
	KL2-G-5@3	4.33685	337060000	1.72258	0.0635783	-0.44	2.16258		2.267	0.4836	7.3902	11.0539	0.1595	10.8685	13.2211	50.2456	2.5804	0.2508	98.5657		0.812797	22.8085	6.35372
	KL2-G-7@4	4.22123	328451600	1.77676	0.0705985	-0.44	2.21676		2.5069	0.4889	7.4414	11.1427	0.1812	10.7143	13.1617	50.2936	2.5932	0.2832	98.8605		0.823061	22.7927	6.39462
	KL2-G-10@5	4.23421	329768600	1.66781	0.0741887	-0.44	2.10781		2.4869	0.4801	7.4074	11.1158	0.1856	10.7807	13.2136	50.3574	2.636	0.2447	98.977		0.81918	22.7984	6.37977
	KL2-G-13@6	4.20417	329252500	1.66313	0.0650911	-0.44	2.10313		2.364	0.4712	7.381	11.0799	0.1529	10.8222	13.3126	50.2636	2.6182	0.2444	98.7463		0.811341	22.8004	6.38706
	KL2-G-15@7	4.39654	343630800	1.69388	0.0602767	-0.44	2.13388		2.3183	0.4733	7.434	11.1734	0.1667	10.8279	13.2428	50.3968	2.6105	0.2006	98.9025		0.816525	22.8032	6.42076
	KL2-G-19@8	4.40218	343590100	1.65522	0.067208	-0.44	2.09522		2.359	0.4739	7.5047	11.1686	0.1838	10.7376	13.3311	50.4534	2.5773	0.2138	99.0787		0.815293	22.7876	6.44871
	KL2-G-21@9	4.4125	343594200	1.72228	0.0653117	-0.44	2.16228		2.4618	0.476	7.4185	11.1351	0.1725	10.8414	13.3799	49.9477	2.6289	0.2208	98.726		0.820443	22.8134	6.47003
	KL2-G-22@10	4.35782	339748800	1.72346	0.0625619	-0.44	2.16346		2.4689	0.481	7.4365	11.1779	0.145	10.7832	13.3853	50.6176	2.6214	0.2159	99.3976		0.812433	22.7844	6.43872
	KL2-G-25@11	4.34162	336443700	1.76504	0.068746	-0.44	2.20504		2.2608	0.4856	7.2275	11.133	0.1579	10.8485	13.2501	50.6371	2.586	0.2959	98.9308		0.801622	22.8069	6.33715
	KL2-G-28@12	4.30783	336541100	1.68949	0.069405	-0.44	2.12949		2.4814	0.4799	7.3202	11.1532	0.1757	10.7754	13.1682	50.4839	2.5974	0.243	98.9416		0.81585	22.798	6.36072
	KL2-G-29@13	4.2393	333525400	1.64526	0.064501	-0.44	2.08526		2.4088	0.4908	7.4713	11.1552	0.1604	10.8703	13.2277	49.9107	2.6462	0.2729	98.6931		0.828141	22.8211	6.458
	KL2-G-32@14	4.22303	333038600	1.69036	0.0647863	-0.44	2.13036		2.3313	0.462	7.387	11.0953	0.1503	10.8375	13.321	50.3511	2.6145	0.2685	98.845		0.809959	22.8004	6.39103
	KL2-G-33@15	4.23891	332256300	1.69768	0.0572508	-0.44	2.13768		2.3634	0.4683	7.2982	11.2262	0.1826	10.8043	13.2587	50.6239	2.5862	0.2637	99.1235		0.809781	22.8042	6.40648
ML3B-G	ML3B-G-3@1	4.34327	334420500	0.913417	0.0687061	-0.35	1.26342		2.48	0.3777	6.5923	10.5243	0.1802	11.0194	13.6533	52.0509	2.1211	0.2127	99.2781		0.734371	22.7458	5.84263
	ML3B-G-4@2	4.31291	333789400	1.04052	0.0702037	-0.35	1.39052		2.3935	0.3794	6.6605	10.5001	0.1909	11.0809	13.6539	51.4175	2.1001	0.2422	98.6766		0.742781	22.7708	5.89975
	ML3B-G-7@3	4.31557	333689700	0.97521	0.0724973	-0.35	1.32521		2.5225	0.3746	6.652	10.5527	0.1666	10.973	13.666	51.4181	2.1402	0.2514	98.7536		0.744138	22.7563	5.93023
	ML3B-G-10@4	4.22091	341913100	1.18197	0.08781	-0.35	1.53197		2.378	0.3777	6.7087	10.5513	0.1638	10.9642	13.5599	51.7065	2.0867	0.2333	98.7763		0.742284	22.7468	5.88907
	ML3B-G-11@5	4.38841	336901600	1.06395	0.065068	-0.35	1.41395		2.3685	0.376	6.6694	10.5395	0.1726	11.0494	13.5678	52.0926	2.1022	0.2208	99.2229		0.737711	22.7479	5.84194
	ML3B-G-13@6	4.33607	336552300	0.893503	0.0595738	-0.35	1.2435		2.3866	0.3764	6.6714	10.572	0.1701	11.0501	13.6599	51.8232	2.0905	0.1979	99.0437		0.739467	22.7546	5.90705
	ML3B-G-15@7	4.40601	341653500	1.10026	0.0629394	-0.35	1.45026		2.3059	0.3704	6.7079	10.5845	0.1806	10.9705	13.7148	51.6781	2.088	0.2139	98.8698		0.737236	22.7512	5.94772
	ML3B-G-17@8	4.40366	341869700	1.04315	0.0594901	-0.35	1.39315		2.4759	0.3705	6.5985	10.5501	0.1791	11.0223	13.5962	51.7147	2.1065	0.2188	98.8589		0.740623	22.7572	5.87445
	ML3B-G-19@9	4.39725	341306600	1.12574	0.0679652	-0.35	1.47574		2.3597	0.38	6.6624	10.5226	0.1793	11.1172	13.7146	51.7669	2.1207	0.291	99.1396		0.737617	22.7661	5.89613
	ML3B-G-22@10	4.28819	333423400	1.07859	0.0692275	-0.35	1.42859		2.4286	0.3846	6.5143	10.5762	0.172	11.0249	13.6286	51.5107	2.1293	0.2424	98.6761		0.73782	22.7702	5.89831
	ML3B-G-24@11	4.28506	333314600	1.10524	0.0628169	-0.35	1.45524		2.355	0.3638	6.7684	10.5734	0.1509	11.1129	13.8678	51.7148	2.121	0.2428	99.2999		0.738686	22.7573	5.98768
	ML3B-G-26@12	4.27176	332968200	1.00918	0.0573909	-0.35	1.35918		2.4768	0.386	6.7077	10.5399	0.1832	11.0158	13.7563	51.3616	2.1042	0.2258	98.8009		0.744375	22.7609	5.96135
	ML3B-G-27@13	4.23257	330976800	1.09177	0.0649674	-0.35	1.44177		2.3362	0.3697	6.6974	10.5142	0.1825	11.009	13.6179	51.8351	2.1197	0.2395	98.9328		0.737605	22.75	5.86877
	ML3B-G-28@14	4.22819	330356000	1.03876	0.0637028	-0.35	1.38876		2.5593	0.3724	6.6826	10.5497	0.1696	10.9927	13.7136	51.5796	2.1053	0.2203	98.9951		0.743729	22.7495	5.93182
	ML3B-G-29@15	4.22224	330722200	0.940067	0.0688984	-0.35	1.29007		2.6138	0.3888	6.7504	10.5947	0.1677	11.0427	13.6094	51.9569	2.1054	0.2235	99.5311		0.750181	22.7454	5.91121
NIST610	NIST-610-1@1	4.43707	336752300	-3.6279	0.0712292	-0.09	-3.5379		13.1423	0.0594	0.0537	11.4247	0.0794	0.0539	1.9764	69.7475	0.088	0.1134	96.8847		0.666419	21.1448	0.599987
	NIST-610-3@2	4.39701	338567000	-3.75646	0.0596199	-0.09	-3.66646		13.3395	0.0621	0.0737	11.4157	0.0657	0.0369	1.9451	69.8923	0.0776	0.1214	97.1642		0.671165	21.137	0.578365
	NIST-610-4@3	4.43683	339507100	-3.63346	0.0549698	-0.09	-3.54346		13.6745	0.0606	0.044	11.4807	0.0705	0.0567	1.9657	69.2388	0.0906	0.1259	96.939		0.687031	21.1523	0.672221
	NIST-610-5@4	4.38708	333080700	-3.73625	0.0787447	-0.09	-3.64625		13.6225	0.0559	0.0797	11.5298	0.042	0.0758	2.0353	69.6164	0.0939	0.1401	97.4419		0.68285	21.1492	0.689827
	NIST-610-6@5	4.30267	329733900	-3.77989	0.0726025	-0.09	-3.68989		13.8239	0.0732	0.0698	11.4693	0.0497	0.0535	1.941	69.5532	0.0903	0.1045	97.3701		0.689201	21.1432	0.636829
	NIST-610-8@6	4.25502	330960000	-3.31688	0.0592751	-0.09	-3.22688		13.3849	0.0516	0.0766	11.5333	0.0552	0.0516	2.0508	69.7057	0.0799	0.1509	97.2608		0.674801	21.1479	0.686928
	NIST-610-9@7	4.23883	326154600	-3.68823	0.0618531	-0.09	-3.59823		13.396	0.0571	0.1035	11.5583	0.0707	0.0374	2.0378	70.02	0.0769	0.1211	97.6017		0.674441	21.1456	0.674884
	NIST-610-10@8	4.22788	328905600	-3.44369	0.0648848	-0.09	-3.35369		13.6887	0.0631	0.054	11.5024	0.0524	0.0582	1.952	69.4317	0.0641	0.1496	97.1258		0.686732	21.1487	0.665669
	NIST-610-11@9	4.41414	344270500	-3.39683	0.0565782	-0.09	-3.30683		13.6852	0.0595	0.0584	11.5201	0.0426	0.0545	2.0061	69.4048	0.0777	0.1137	97.1489		0.685767	21.1472	0.692011
	NIST-610-12@10	4.41454	339477100	-3.71312	0.0760546	-0.09	-3.62312		13.9525	0.0597	0.0613	11.5842	0.0531	0.054	2.0699	69.8953	0.0759	0.0849	98.002		0.688735	21.1453	0.699862
	NIST-610-13@11	4.39826	341499200	-3.55908	0.0660091	-0.09	-3.46908		13.2149	0.0479	0.0624	11.4725	0.0613	0.0501	1.9404	69.3026	0.0712	0.1218	96.4695		0.674652	21.1489	0.65945
	NIST-610-14@12	4.41023	342454100	-3.49348	0.0578086	-0.09	-3.40348		13.5822	0.0605	0.0882	11.5456	0.067	0.057	2.0323	70.159	0.0776	0.1726	97.9471		0.6777	21.1462	0.650945
	NIST-610-15@13	4.26371	331075200	-3.61413	0.0708432	-0.09	-3.52413		13.488	0.0507	0.1023	11.4438	0.0287	0.0394	1.9121	69.7102	0.0712	0.1325	97.0793		0.67891	21.1341	0.608016
	NIST-610-17@14	4.42299	344548300	-3.41206	0.0673292	-0.09	-3.32206		13.1834	0.0625	0.0695	11.6029	0.0862	0.07	1.9097	69.7358	0.0862	0.1094	97.0562		0.675968	21.1615	0.687145
	NIST-610-18@15	4.28874	332009800	-3.65894	0.0560902	-0.09	-3.56894		13.4466	0.0491	0.0526	11.6932	0.0939	0.0579	1.9575	69.7954	0.0856	0.1246	97.4969		0.682788	21.1656	0.740348
	NIST-610-20@16	4.24509	329402200	-3.67388	0.0650203	-0.09	-3.58388		13.6489	0.0576	0.0541	11.484	0.0603	0.0755	1.9734	69.9073	0.0688	0.0801	97.5524		0.68047	21.1428	0.618023
	NIST-610-21@17	4.24071	332164100	-3.45746	0.0573172	-0.09	-3.36746		13.6462	0.0574	0.0484	11.5048	0.0547	0.071	1.8594	68.788	0.0691	0.1387	96.3436		0.694471	21.1588	0.701013
	NIST-610-23@18	4.23546	329854700	-3.58631	0.0628067	-0.09	-3.49631		13.3531	0.0497	0.0968	11.5316	0.0658	0.0424	1.914	68.8627	0.0786	0.0775	96.1872		0.68648	21.1564	0.732245
	NIST-610-24@19	4.23492	328380500	-3.66245	0.0635837	-0.09	-3.57245		13.5059	0.0476	0.0625	11.4442	0.053	0.0414	2.0024	69.607	0.084	0.0794	97.0212		0.676719	21.1382	0.631544
	NIST-610-25@20	4.35985	342477400	-3.46097	0.0592957	-0.09	-3.37097		13.1073	0.0611	0.0695	11.4785	0.0807	0.0535	1.9439	69.3864	0.0927	0.1144	96.495		0.672032	21.1538	0.657553
	NIST-610-26@21	4.17632	329170000	-3.34353	0.063566	-0.09	-3.25353		13.4943	0.044	0.0882	11.4633	0.0426	0.0424	1.9428	70.0927	0.0668	0.1142	97.5244		0.674872	21.1325	0.589242
NIST612	NIST612-1@1	4.29242	330926900	-3.40767	0.0662306	0.01	-3.41767		14.0072	0.0241	-0.0142	11.9524	0.0199	-0.0078	2.036	71.627	0.0022	0.0204	99.7145		0.679947	21.1334	0.726206
	NIST612-4@2	4.27036	330592200	-3.47649	0.0614155	0.01	-3.48649		13.5546	0.0208	0.0495	11.8812	-0.0304	0.0058	2.0118	71.3977	-0.0085	-0.0071	98.9285		0.670624	21.1244	0.713979
	NIST612-7@3	4.25659	329618700	-3.50607	0.0571255	0.01	-3.51607		13.8604	0.0103	-0.0071	11.9339	0.0099	0.0083	2.0731	71.7945	0.0146	-0.0045	99.7187		0.673283	21.1299	0.711359
	NIST612-9@4	4.41375	340495900	-3.76818	0.068848	0.01	-3.77818		13.9002	0.0077	0.0326	11.9409	0.0116	0.0253	2.0172	71.9844	-0.002	0.0045	99.925		0.676239	21.1295	0.692547
	NIST612-11@5	4.43988	339796300	-3.6115	0.0716391	0.01	-3.6215		14.0686	0.0053	0.0043	11.9791	0.0055	-0.001	2.0835	72.1997	0.0124	0.0042	100.405		0.676128	21.1255	0.705014
	NIST612-13@6	4.43347	342426300	-3.70199	0.0599307	0.01	-3.71199		13.6884	0.0123	0.017	11.8966	0.0061	-0.001	2.077	71.3723	0.0164	-0.0084	99.1175		0.672161	21.1307	0.734224
	NIST612-14@7	4.28092	330968400	-3.64342	0.0713042	0.01	-3.65342		13.5792	0.0024	-0.0014	11.8781	0.0061	-0.0019	1.9911	71.6301	0.0071	0.035	99.1521		0.667778	21.1277	0.676175
	NIST612-15@8	4.27646	331995800	-3.40826	0.063675	0.01	-3.41826		13.4567	0.0009	-0.0056	11.9482	0.0326	0.0083	2.0638	71.7727	0.028	0.0253	99.3444		0.66394	21.1373	0.719307
	NIST612-16@9	4.27075	334382900	-3.40006	0.0585597	0.01	-3.41006		14.1984	0.0061	0	12.1051	0.0293	0.0374	2.1358	71.973	0.0122	0.0191	100.526		0.684951	21.1454	0.807383
	NIST612-17@10	4.24837	332272500	-3.47649	0.0588319	0.01	-3.48649		14.0487	0.0077	0.0085	12.0611	0.0099	0.0073	2.0736	71.9499	0.0146	0.0188	100.205		0.680984	21.1368	0.77149
	NIST612-18@11	4.26167	329551100	-3.68383	0.0628999	0.01	-3.69383		13.7972	0.0121	-0.0042	12.0105	-0.0127	-0.0034	2.0162	71.6667	0.0124	0.055	99.577		0.675976	21.1345	0.752167
	NIST612-19@12	4.23969	332121800	-3.46507	0.0606409	0.01	-3.47507		13.8796	0.0096	0.0142	12.0777	-0.0028	0.0034	2.0511	72.2082	0.0101	-0.0214	100.267		0.675246	21.1322	0.753227
	NIST612-19@13	4.37448	342254800	-3.38307	0.0635152	0.01	-3.39307		13.8796	0.0096	0.0142	12.0777	-0.0028	0.0034	2.0511	72.2082	0.0101	-0.0214	100.267		0.675246	21.1322	0.753227
	NIST612-20@14	4.37354	341233500	-3.49201	0.0651405	0.01	-3.50201		13.9321	0.014	0.0198	11.943	-0.0055	-0.0024	2.0996	72.1015	0.0026	0.0392	100.183		0.67254	21.1236	0.700751
	NIST612-20@15	4.34335	338634200	-3.38043	0.0648127	0.01	-3.39043		13.9321	0.014	0.0198	11.943	-0.0055	-0.0024	2.0996	72.1015	0.0026	0.0392	100.183		0.67254	21.1236	0.700751
StHs6/80-G	StHs6-80-G-1@1	4.31112	303371700	-2.1891	0.0635391	-0.17	-2.0191		4.5733	1.3116	2.0535	5.3604	0.0693	4.4092	17.7961	64.0397	0.7224	0.1337	100.496		0.172224	21.3673	1.99419
	StHs6-80-G-4@2	4.30955	303698300	-2.38062	0.0691517	-0.17	-2.21062		4.4952	1.2919	2.0462	5.3763	0.0779	4.4249	17.8085	63.3295	0.7037	0.1548	99.7362		0.171981	21.3817	2.06828
	StHs6-80-G-9@3	4.30423	302098000	-2.43129	0.0750243	-0.17	-2.26129		4.554	1.3108	1.9999	5.3836	0.0715	4.4801	17.8682	64.3197	0.6955	0.156	100.839		0.170177	21.3748	1.98886
	StHs6-80-G-10@4	4.35297	305457400	-2.31415	0.0593675	-0.17	-2.14415		4.7308	1.2898	2.0057	5.3124	0.0761	4.4575	17.9639	63.8732	0.7253	0.1643	100.599		0.171273	21.3718	2.01375
	StHs6-80-G-11@5	4.37151	306565700	-2.40757	0.0710366	-0.17	-2.23757		4.4535	1.3025	1.9825	5.3475	0.0636	4.4685	17.9347	64.1978	0.6988	0.1877	100.637		0.165071	21.3723	1.99242
	StHs6-80-G-14@6	4.3956	308170100	-2.40903	0.0762356	-0.17	-2.23903		4.4695	1.2986	2.0203	5.3939	0.0608	4.3688	17.8885	64.2658	0.711	0.1418	100.626		0.166477	21.3596	2.00846
	StHs6-80-G-19@7	4.39513	309199400	-2.52471	0.0794679	-0.17	-2.35471		4.4185	1.2973	1.9728	5.4402	0.074	4.4393	17.9432	63.7732	0.7021	0.1704	100.231		0.166483	21.3832	2.08223
	StHs6-80-G-20@8	4.39435	309475500	-2.37682	0.0632789	-0.17	-2.20682		4.8342	1.2843	2.0479	5.3765	0.0921	4.3993	17.8658	64.2761	0.6976	0.1444	101.027		0.176524	21.3626	1.99784
	StHs6-80-G-21@9	4.3942	309252900	-2.4925	0.0616395	-0.17	-2.3225		4.6312	1.2889	1.9504	5.3485	0.0773	4.4435	17.8694	64.2463	0.701	0.1658	100.722		0.168499	21.3688	1.96627
	StHs6-80-G-23@10	4.27614	302873800	-2.31327	0.0625086	-0.17	-2.14327		4.3171	1.3115	1.9612	5.3851	0.0757	4.4451	17.9719	64.0812	0.6897	0.1415	100.383		0.161679	21.3757	2.02862
	StHs6-80-G-24@11	4.26089	299240100	-2.29394	0.058591	-0.17	-2.12394		4.5948	1.2911	1.9991	5.3689	0.0753	4.436	17.7924	64.0414	0.693	0.1803	100.494		0.171396	21.3721	1.98698
	StHs6-80-G-26@12	4.27137	300615800	-2.31942	0.0610769	-0.17	-2.14942		4.4605	1.2982	1.9136	5.406	0.0798	4.4569	17.6752	63.8709	0.7228	0.1606	100.045		0.169104	21.3855	1.97721
	StHs6-80-G-29@13	4.23061	299803200	-2.3733	0.0681364	-0.17	-2.2033		4.6902	1.2825	1.966	5.3478	0.0668	4.5123	17.782	63.9946	0.6976	0.1581	100.502		0.173367	21.3788	1.97026
	StHs6-80-G-30@14	4.22936	299210100	-2.54492	0.0699036	-0.17	-2.37492		4.758	1.2773	1.9852	5.3858	0.0742	4.4335	17.9694	64.4749	0.6963	0.1308	101.19		0.171035	21.3622	1.9979
	StHs6-80-G-32@15	4.22772	298869700	-2.41137	0.070449	-0.17	-2.24137		4.5008	1.294	2.0235	5.3839	0.0779	4.506	18.0035	64.1155	0.7113	0.1643	100.785		0.168386	21.3811	2.04506
T1-G	T1-G-2@1	4.29985	315523200	-1.00362	0.0762828	-0.23	-0.773617		3.1776	1.9446	3.7486	7.0731	0.1386	6.5006	17.0179	58.6775	0.7137	0.1711	99.1826		0.32983	21.9097	3.57816
	T1-G-4@2	4.3137	313900100	-0.789539	0.0571231	-0.23	-0.559539		3.1932	2.0185	3.7565	7.1392	0.126	6.4549	16.85	58.3157	0.7137	0.1693	98.7513		0.337223	21.9199	3.60804
	T1-G-5@3	4.31299	314824300	-0.98136	0.0662602	-0.23	-0.75136		3.2957	1.9751	3.8196	7.2066	0.1405	6.4802	17.1992	58.8044	0.7351	0.1671	99.8463		0.334994	21.9112	3.69955
	T1-G-7@4	4.41055	322813200	-0.857482	0.0594799	-0.23	-0.627482		3.2208	1.9599	3.7027	7.1312	0.1354	6.4973	17.1694	58.5799	0.7432	0.1956	99.3607		0.328257	21.9195	3.64702
	T1-G-10@5	4.4222	324561100	-0.883839	0.0968022	-0.23	-0.653839		3.1202	1.9768	3.7876	7.1953	0.1348	6.4209	16.9081	58.7766	0.7141	0.1729	99.2343		0.333756	21.9086	3.61834
	T1-G-11@6	4.44395	325269500	-0.904924	0.0627834	-0.23	-0.674924		3.0919	1.9502	3.6692	7.1719	0.1281	6.4544	17.0865	58.9609	0.7247	0.171	99.4154		0.323809	21.9067	3.60859
	T1-G-13@7	4.39631	322241700	-0.785439	0.0643538	-0.23	-0.555439		3.3508	1.9712	3.7975	7.1371	0.1385	6.4565	16.9562	58.6317	0.7114	0.1624	99.3288		0.33861	21.907	3.61265
	T1-G-14@8	4.40679	321350100	-0.894674	0.0578001	-0.23	-0.664674		3.1139	1.9624	3.697	7.1275	0.1448	6.4733	16.9284	58.6962	0.7483	0.1905	99.0849		0.329314	21.9188	3.57461
	T1-G-17@9	4.39013	322429800	-0.800668	0.0566779	-0.23	-0.570668		3.0065	1.9856	3.7392	7.0943	0.1365	6.4806	16.9073	58.2113	0.7352	0.1401	98.4489		0.330202	21.9211	3.60291
	T1-G-18@10	4.2472	313765600	-0.820582	0.0688079	-0.23	-0.590582		2.9799	1.9601	3.7443	7.0913	0.0986	6.4909	16.9821	58.0163	0.7328	0.1522	98.2484		0.328096	21.9195	3.63799
	T1-G-20@11	4.24861	314434200	-0.689968	0.0621613	-0.23	-0.459968		3.1271	1.9791	3.7553	7.0945	0.1437	6.4715	16.9956	58.6447	0.7234	0.1835	99.1289		0.33004	21.9139	3.58892
	T1-G-21@12	4.25901	314096000	-0.838153	0.0652765	-0.23	-0.608153		3.2089	2.0106	3.6986	7.1475	0.1213	6.4888	16.9642	58.8408	0.717	0.1392	99.3504		0.331624	21.9091	3.58183
	T1-G-24@13	4.20879	311985300	-0.857775	0.073212	-0.23	-0.627775		3.2647	1.9993	3.7282	7.0252	0.1313	6.4179	17.0044	58.7605	0.7285	0.1526	99.2126		0.328821	21.8942	3.53668
	T1-G-26@14	4.21724	327096400	-0.579269	0.066097	-0.23	-0.349269		3.1645	1.9957	3.731	7.0841	0.1379	6.4345	16.9102	58.7997	0.7444	0.1268	99.1406		0.330186	21.8998	3.54354
	T1-G-29@15	4.40163	320900300	-0.740925	0.062726	-0.23	-0.510925		3.2056	1.9842	3.7087	7.0689	0.1264	6.4188	16.9152	58.6914	0.7139	0.1335	98.9665		0.329568	21.8962	3.54154
